# Supplementary figures and images for: A microfluidics-based stem cell model of early post-implantation human development
Source: Springer Nature journal article supplement (doi:10.1038/s41596-020-00417-w), 2020-12-11

white

80-200

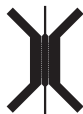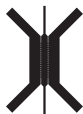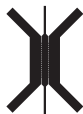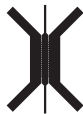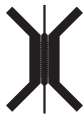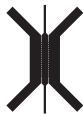

Supplement: MOESM2 [file 41596_2020_417_MOESM2_ESM13.zip]
